# Supplementary material for: Astrocytoma with myelin oligodendrocyte glycoprotein antibody associated encephalomyelitis: A case report
Source: PubMed Central journal article supplement (PMC9542675; doi:10.1097/md.0000000000031003), 2022-10-07

Supplemental file 1: The T1 sequence of MRI

1. This admission (A) and follow-up after discharge (B);
2. Compared with this admission, the mass effect of brain stem and cerebellar lesions was more obvious during follow-up.

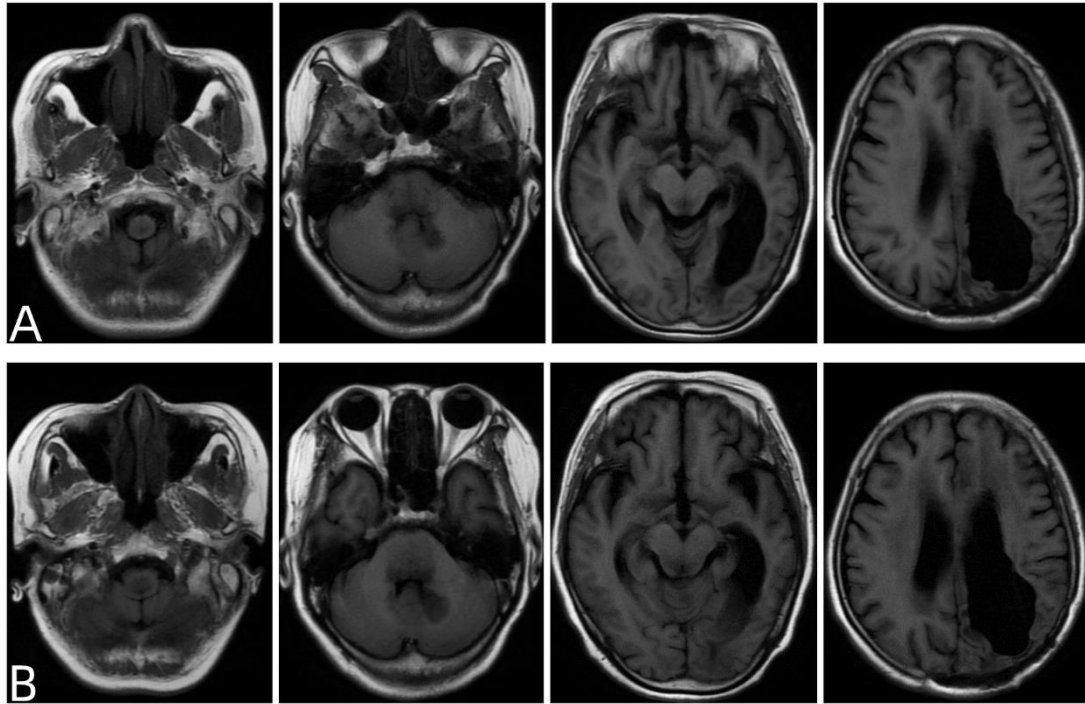

Supplement: medi-101-e31003-s001.pdf [file medi-101-e31003-s001.pdf]
